# Supplementary material
Source: MDPI journal article supplement (https://www.mdpi.com/2410-3888/7/5/290)
Supplement: s1 [file s1]

**Table S1.** The level of 13 trace elements in the outer, middle, and inner site of the shell.

|                 | Na         | Sr        | Mg        | Fe       | B        | Mn      | Zn      | P       | Ba     | Li      | Ni       | Cu     | Pb     |
|-----------------|------------|-----------|-----------|----------|----------|---------|---------|---------|--------|---------|----------|--------|--------|
|                 | Ppm        |           |           |          |          |         |         |         |        |         |          |        |        |
| <b>DS-w-1-I</b> | 16793.9070 | 1946.0470 | 440.4062  | 13.1522  | 43.1634  | 22.6128 | 1.5105  | 12.8359 | 1.8347 | 3.3524  | 0.5850   | 0.4874 | 0.1273 |
| <b>DS-w-1-M</b> | 16963.1283 | 1738.6671 | 839.2895  | 289.8449 | 51.3515  | 11.1356 | 2.1028  | 6.7399  | 1.5590 | 6.5987  | 412.1868 | 2.9746 | 0.5562 |
| <b>DS-w-1-O</b> | 20034.5809 | 1167.9069 | 542.8054  | 6.7259   | 58.4654  | 1.0359  | 4.4220  | 5.2899  | 0.7823 | 4.1643  | 2.1902   | 0.2533 | 0.0608 |
| <b>DS-w-2-I</b> | 14617.6839 | 2205.8277 | 470.7417  | 5.7514   | 45.0593  | 23.6063 | 1.0578  | 7.6924  | 2.5691 | 2.9716  | 3.5650   | 0.4089 | 0.1905 |
| <b>DS-w-2-M</b> | 17507.1529 | 1424.8686 | 601.9501  | 12.4273  | 55.9730  | 4.6776  | 12.5462 | 11.2419 | 1.3690 | 5.9305  | 3.4922   | 0.3893 | 0.1955 |
| <b>DS-w-2-O</b> | 18402.2159 | 1194.9798 | 477.5037  | 4.7538   | 73.8792  | 0.6743  | 1.3897  | 3.3308  | 0.7132 | 2.8419  | 0.2723   | 0.1814 | 0.1148 |
| <b>DS-w-3-I</b> | 17516.6237 | 1739.5420 | 650.3098  | 81.2376  | 33.9682  | 65.2156 | 14.6255 | 49.6612 | 2.2377 | 15.5978 | 1.5311   | 7.7735 | 0.1593 |
| <b>DS-w-3-M</b> | 17308.0323 | 1501.5784 | 654.0134  | 20.3759  | 59.5727  | 11.1211 | 12.9345 | 10.2307 | 1.2705 | 4.1357  | 0.7342   | 0.6110 | 0.1022 |
| <b>DS-w-3-O</b> | 16870.5666 | 1276.5476 | 768.2713  | 22.8269  | 61.0033  | 3.0786  | 21.6162 | 28.6971 | 0.8051 | 2.5943  | 14.9585  | 1.1981 | 0.1855 |
| <b>SS-w-1-I</b> | 20081.1532 | 2055.9380 | 419.6984  | 121.5156 | 82.5527  | 50.4974 | 1.9677  | 35.1366 | 5.2791 | 3.3726  | 2.8164   | 0.5799 | 0.0890 |
| <b>SS-w-1-M</b> | 16934.8478 | 2152.2588 | 475.7193  | 37.9622  | 110.9675 | 18.4583 | 2.4090  | 10.5288 | 4.3565 | 3.7196  | 268.2877 | 2.0945 | 0.3819 |
| <b>SS-w-1-O</b> | 26133.9110 | 2227.1774 | 341.2365  | 7.3483   | 197.9757 | 74.5306 | 4.8217  | 16.9300 | 4.9752 | 5.1326  | 0.4358   | 0.2570 | 0.0529 |
| <b>SS-w-2-I</b> | 19233.6724 | 2235.9412 | 555.1867  | 155.1152 | 84.1397  | 42.0622 | 1.2470  | 17.3561 | 5.9002 | 3.4963  | 1.2241   | 0.2239 | 0.0744 |
| <b>SS-w-2-M</b> | 16200.6105 | 2458.9030 | 562.3823  | 41.1789  | 120.2752 | 42.7290 | 3.5441  | 11.1077 | 4.6655 | 3.5167  | 347.2583 | 1.0778 | 0.4464 |
| <b>SS-w-2-O</b> | 21428.9078 | 1991.4113 | 411.9428  | 52.9960  | 183.1072 | 48.1091 | 11.6982 | 11.8330 | 4.1893 | 4.8563  | 0.8200   | 0.5881 | 0.0789 |
| <b>SS-w-3-I</b> | 17382.4877 | 1644.3688 | 529.2535  | 68.7118  | 49.1238  | 53.9801 | 59.4519 | 41.8707 | 4.3895 | 2.8761  | 2.2434   | 1.4250 | 0.1630 |
| <b>SS-w-3-M</b> | 17958.6268 | 2883.7490 | 705.6823  | 208.2853 | 124.1189 | 20.3279 | 21.1600 | 31.2100 | 5.6062 | 5.0033  | 1.3267   | 1.0609 | 0.1709 |
| <b>SS-w-3-O</b> | 24310.0535 | 1861.7405 | 414.9964  | 11.2342  | 195.5938 | 12.0982 | 9.3492  | 14.1859 | 3.5703 | 5.5371  | 0.9079   | 0.5570 | 0.0444 |
| <b>XX-w-1-I</b> | 17538.6808 | 1595.3476 | 671.5073  | 8.1473   | 27.4411  | 32.3200 | 0.7158  | 6.7400  | 1.2436 | 6.3859  | 0.2881   | 0.2964 | 0.1156 |
| <b>XX-w-1-M</b> | 16748.0452 | 1163.8066 | 728.0186  | 10.9137  | 62.3503  | 3.7807  | 0.8139  | 3.5477  | 0.9370 | 4.8085  | 0.6663   | 0.6986 | 0.1058 |
| <b>XX-w-1-O</b> | 22480.4288 | 1126.1384 | 685.3910  | 9.6222   | 56.6339  | 3.1546  | 1.8761  | 4.1813  | 0.6812 | 11.3784 | 0.3641   | 1.0662 | 0.0868 |
| <b>XX-w-2-I</b> | 17230.6096 | 1446.3751 | 801.8887  | 1.3219   | 45.8926  | 5.7291  | 1.8170  | 2.7211  | 1.4840 | 5.4316  | 1.2929   | 0.4675 | 0.0163 |
| <b>XX-w-2-M</b> | 16106.8493 | 1499.5342 | 726.8768  | 17.9214  | 45.6332  | 17.4766 | 1.2953  | 6.0460  | 1.1729 | 4.9028  | 1.7926   | 0.4596 | 0.1236 |
| <b>XX-w-2-O</b> | 20785.4695 | 1277.0166 | 663.6608  | 7.8643   | 74.3169  | 4.5602  | 0.9753  | 3.5425  | 0.8406 | 8.9374  | 1.6877   | 1.2902 | 0.0309 |
| <b>XX-w-3-I</b> | 16132.9062 | 1901.5529 | 466.6568  | 102.4935 | 46.5842  | 28.5940 | 26.1214 | 30.0233 | 1.6259 | 5.4225  | 6.2105   | 6.4606 | 0.6636 |
| <b>XX-w-3-M</b> | 16415.4360 | 1581.1110 | 1071.5975 | 78.8346  | 59.5928  | 15.8303 | 19.2865 | 16.6079 | 1.6947 | 5.4684  | 6.7873   | 4.6746 | 0.3304 |
| <b>XX-w-3-O</b> | 21809.8909 | 1197.6905 | 593.7593  | 59.8878  | 57.8031  | 5.8254  | 86.7235 | 16.4456 | 0.9001 | 13.2368 | 9.0745   | 1.3138 | 0.1888 |
| <b>ZS-w-1-I</b> | 16036.7739 | 1485.6861 | 528.7279  | 30.3210  | 22.3833  | 20.1632 | 1.3369  | 14.5869 | 1.4274 | 3.8572  | 6.0305   | 1.9339 | 0.1590 |
| <b>ZS-w-1-M</b> | 17318.2224 | 1586.8703 | 985.7935  | 20.7798  | 48.7585  | 6.2017  | 2.3051  | 5.9536  | 1.8360 | 6.9777  | 3.2189   | 0.5950 | 0.1406 |

|                 |            |           |           |          |         |          |         |         |         |         |         |         |        |
|-----------------|------------|-----------|-----------|----------|---------|----------|---------|---------|---------|---------|---------|---------|--------|
| <b>ZS-w-1-O</b> | 20751.0319 | 1181.8065 | 586.7852  | 22.1588  | 63.6057 | 3.1027   | 1.2365  | 6.9971  | 1.4560  | 5.8399  | 2.8290  | 0.3558  | 0.0800 |
| <b>ZS-w-2-I</b> | 18548.1376 | 1701.8583 | 399.1071  | 10.6454  | 26.3261 | 25.7470  | 2.1359  | 4.2920  | 2.0540  | 6.3820  | 4.6774  | 0.2119  | 0.1287 |
| <b>ZS-w-2-M</b> | 18274.3331 | 1368.3164 | 949.8658  | 11.8485  | 50.9203 | 3.1579   | 1.5189  | 3.8425  | 1.3359  | 12.0218 | 2.7356  | 0.3984  | 0.1307 |
| <b>ZS-w-2-O</b> | 21669.7135 | 1338.5729 | 644.2915  | 7.6865   | 90.7385 | 1.6066   | 2.2891  | 6.1545  | 1.9139  | 6.7530  | 0.5262  | 0.2684  | 0.0759 |
| <b>ZS-w-3-I</b> | 18953.3705 | 1962.5674 | 603.5038  | 55.4375  | 56.4193 | 9.0463   | 24.3783 | 21.2966 | 2.5231  | 6.3660  | 1.9756  | 1.2073  | 0.3724 |
| <b>ZS-w-3-M</b> | 18247.3435 | 1410.3332 | 1104.3692 | 21.0919  | 58.3630 | 4.8840   | 9.7125  | 15.8650 | 1.7543  | 8.1316  | 0.4381  | 0.8944  | 0.1100 |
| <b>ZS-w-3-O</b> | 24828.0775 | 1140.5021 | 730.9788  | 14.8832  | 92.9451 | 2.1673   | 14.5978 | 15.0297 | 0.9186  | 14.2374 | 1.3145  | 0.7847  | 0.0882 |
| <b>CH01-1-I</b> | —          | 1583.5915 | 577.6358  | 82.9563  | 39.1363 | —        | —       | 23.2971 | 3.6651  | —       | n.d.    | n.d.    | 0.1227 |
| <b>CH01-1-M</b> | 17055.5422 | 1705.5084 | 668.1655  | 17.9570  | 42.1019 | 37.5559  | 7.9464  | 7.7158  | 10.0062 | 5.6620  | 3.0569  | 1.2802  | 0.0787 |
| <b>CH01-1-O</b> | 20284.7077 | 1657.8236 | 676.1320  | 13.2417  | 37.5364 | 22.1559  | 9.1439  | 14.4254 | 4.0566  | 6.8124  | 0.9774  | 1.7513  | 0.0763 |
| <b>CH01-2-I</b> | 16560.3183 | 1672.4254 | 348.2983  | 25.2230  | 36.4335 | 28.8291  | 6.7096  | 16.7977 | 8.6469  | 3.8032  | 5.5077  | 1.8220  | 0.9296 |
| <b>CH01-2-M</b> | 17013.7305 | 1365.8224 | 626.7447  | 32.6698  | 33.4063 | 8.0182   | 2.3595  | 8.0493  | 10.0899 | 5.2844  | 10.4329 | 1.0777  | 0.0994 |
| <b>CH01-2-O</b> | 26405.1590 | 1822.0336 | 1464.4145 | 46.0192  | 60.0311 | 7.3399   | 14.2939 | 13.2386 | 4.5463  | 10.4987 | 29.0386 | 1.2824  | 0.1795 |
| <b>CH01-3-I</b> | 15326.8587 | 1470.8260 | 366.6354  | 71.6488  | 17.4037 | 90.5020  | 5.9189  | 26.7970 | 7.8060  | 3.2858  | 4.8212  | 1.2262  | 0.3902 |
| <b>CH01-3-M</b> | 17389.8152 | 1979.6203 | 614.1797  | 27.9284  | 42.3240 | 36.3357  | 6.2250  | 8.9914  | 15.1355 | 5.8903  | 13.7269 | 0.5025  | 0.1249 |
| <b>CH01-3-O</b> | 20300.9402 | 1395.6808 | 735.7061  | 23.4109  | 27.4273 | 4.9527   | 2.4316  | 9.8596  | 3.7117  | 5.9302  | 1.2068  | 0.5546  | 0.1660 |
| <b>CH02-1-I</b> | 15184.3780 | 1949.3029 | 771.3722  | 147.7081 | 32.2696 | 86.7526  | 28.2306 | 40.8491 | 7.6327  | 2.5227  | 3.9148  | 0.9483  | 0.1050 |
| <b>CH02-1-M</b> | 14979.0813 | 2459.8973 | 602.2527  | 31.4865  | 40.1531 | 15.6586  | 17.3391 | 10.3676 | 18.3997 | 3.3384  | 0.7390  | 23.8160 | 0.0774 |
| <b>CH02-1-O</b> | 18405.3139 | 2112.2899 | 593.4025  | 69.0247  | 34.0315 | 10.9679  | 35.8211 | 17.2492 | 8.8268  | 5.3959  | 0.4754  | 2.4573  | 0.3347 |
| <b>CH02-2-I</b> | 13613.1278 | 2635.3043 | 696.1730  | 34.2307  | 25.2180 | 198.5121 | 6.5224  | 11.8149 | 21.5200 | 1.9902  | 2.6149  | 0.8766  | 0.9515 |
| <b>CH02-2-M</b> | 14856.5011 | 1297.1971 | 510.1356  | 22.9879  | 17.8789 | 13.6847  | 3.4333  | 6.1861  | 6.7702  | 3.5625  | 12.9147 | 0.8543  | 0.1547 |
| <b>CH02-2-O</b> | 21795.3614 | 1847.9890 | 1056.9861 | 90.6674  | 33.8820 | 25.9062  | 11.8811 | 27.7246 | 8.4894  | 9.3099  | 1.5197  | 1.0626  | 0.4373 |
| <b>CH02-3-I</b> | 16657.1995 | 2557.6976 | 776.0889  | 50.8538  | 27.1106 | 89.4852  | 7.5568  | 13.6665 | 20.6891 | 2.0473  | 1.6822  | 0.4374  | 0.2144 |
| <b>CH02-3-M</b> | 16382.3204 | 2361.2280 | 843.2426  | 32.1083  | 46.9927 | 102.0121 | 3.7894  | 7.7416  | 16.5964 | 4.6650  | 20.2231 | 0.5628  | 0.1193 |
| <b>CH02-3-O</b> | 20407.9720 | 2339.9992 | 1021.1349 | 20.5109  | 43.9156 | 21.7255  | 2.2031  | 14.9876 | 11.3997 | 7.8463  | 0.7142  | 0.6399  | 0.1518 |
| <b>CH03-1-I</b> | 16298.9928 | 2246.0354 | 575.9659  | 85.6844  | 38.7775 | 93.2782  | 33.5749 | 23.3377 | 10.3967 | 3.2954  | 0.8069  | 11.0492 | 0.1187 |
| <b>CH03-1-M</b> | 16246.6855 | 2076.7538 | 597.7358  | 78.4034  | 50.6963 | 128.8014 | 9.7106  | 19.0201 | 6.2947  | 4.0479  | 0.5951  | 12.8119 | 0.0788 |
| <b>CH03-1-O</b> | 17428.2399 | 1833.8479 | 965.2126  | 46.0763  | 32.0602 | 12.0134  | 12.2182 | 18.2446 | 6.5246  | 5.1407  | 1.0498  | 3.6178  | 0.0900 |
| <b>CH03-2-I</b> | 15299.7155 | 1907.5259 | 585.0865  | 95.8716  | 40.1224 | 80.5727  | 2.6924  | 42.4890 | 10.7491 | 3.7966  | 3.4810  | 0.5608  | 0.1444 |
| <b>CH03-2-M</b> | 16290.3421 | 2513.9322 | 804.1607  | 23.3679  | 28.5474 | 7.1493   | 17.8955 | 11.2194 | 12.7395 | 6.6710  | 2.2487  | 0.6204  | 0.1667 |
| <b>CH03-2-O</b> | 16321.9736 | 2086.0079 | 879.8205  | 33.5744  | 35.4913 | 18.6488  | 5.2682  | 18.3665 | 9.7498  | 5.8875  | 1.3290  | 0.9363  | 0.1175 |
| <b>CH03-3-I</b> | 14216.7435 | 2447.8112 | 646.9900  | 51.3092  | 28.2478 | 71.4757  | 8.1623  | 13.0973 | 9.8199  | 2.8415  | 18.2812 | 0.8275  | 0.4574 |
| <b>CH03-3-M</b> | 15408.8131 | 2712.8160 | 672.3566  | 121.3017 | 33.1504 | 81.7201  | 7.1233  | 33.2439 | 10.5033 | 2.9499  | 0.6944  | 2.2170  | 0.3078 |

|          |            |           |           |          |         |         |         |         |         |        |          |          |        |
|----------|------------|-----------|-----------|----------|---------|---------|---------|---------|---------|--------|----------|----------|--------|
| CH03-3-O | 22242.2314 | 1810.5265 | 836.9195  | 70.7151  | 39.1887 | 11.6909 | 4.2308  | 18.1028 | 7.0733  | 6.6598 | 4.9946   | 2.1117   | 0.3807 |
| CH04-1-I | 13547.8600 | 1705.0829 | 706.7735  | 100.5727 | 56.5218 | —       | 15.6629 | —       | 3.4778  | —      | 2.0884   | 3.9269   | 0.0388 |
| CH04-1-M | 16472.5101 | 1913.4079 | 801.3241  | 55.1332  | 32.0529 | 18.6551 | 3.3460  | 9.2720  | 3.8551  | 4.6416 | 0.9116   | 5.3141   | 0.1096 |
| CH04-1-O | 21767.0877 | 2328.7827 | 567.7892  | 50.9519  | 48.8726 | 7.4292  | 16.0084 | 12.6550 | 5.9729  | 5.8390 | 0.5173   | 3.4259   | 0.0812 |
| CH04-2-I | 13587.2564 | 2425.2633 | 691.3192  | 23.0072  | 23.7814 | 65.2751 | 16.0145 | 14.9151 | 4.8093  | 2.5819 | 0.8737   | 0.4028   | 0.2473 |
| CH04-2-M | 14885.2450 | 2000.1744 | 979.3076  | 23.9287  | 25.2064 | 9.8050  | 6.0850  | 8.0674  | 4.2272  | 7.0735 | 5.8043   | 0.9521   | 0.1306 |
| CH04-2-O | 22694.1348 | 2149.8374 | 1049.4686 | 27.0731  | 58.7351 | 15.2788 | 7.0055  | 78.0146 | 4.7328  | 8.2199 | 0.8175   | 3.4939   | 0.2499 |
| CH04-3-I | 15335.2644 | 2065.8260 | 599.3621  | 67.3918  | 24.1217 | 57.9719 | 43.8035 | 49.4938 | 10.8849 | 3.7004 | 13.7831  | 1.2621   | 0.2484 |
| CH04-3-M | 15380.3383 | 1701.5165 | 1420.0356 | 51.8733  | 36.6028 | 7.8010  | 8.3663  | 13.1899 | 3.7795  | 6.8651 | 101.4542 | 1.2750   | 0.3376 |
| CH04-3-O | 16046.3134 | 1838.5381 | 832.0391  | 36.7478  | 38.0040 | 9.1979  | 6.1270  | —       | 4.1783  | 6.4383 | —        | 1.8448   | 0.4039 |
| CH05-1-I | 15751.4207 | 2024.3976 | 347.7292  | 36.6999  | 20.0671 | 65.4675 | 27.7121 | 44.7154 | 8.1833  | 3.2182 | 5.3091   | 1.7637   | 0.0787 |
| CH05-1-M | 15750.6568 | 1534.5060 | 920.3028  | 27.8697  | 24.0241 | 31.7611 | 29.7908 | 13.3997 | 4.1420  | 4.6372 | 1.0736   | 6.4286   | 0.1126 |
| CH05-1-O | 16748.7611 | 2143.8099 | 773.3930  | 23.3232  | 35.0141 | 8.1791  | 16.7175 | 10.1821 | 4.0243  | 5.4420 | 0.6203   | 0.9084   | 0.0879 |
| CH05-2-I | 12604.3000 | 2279.9662 | 312.5668  | 21.5777  | 21.8292 | 84.4958 | 6.3640  | 10.1427 | 6.5095  | 2.7928 | 14.9570  | 5.6067   | 0.2979 |
| CH05-2-M | 18601.5032 | 1900.2120 | 768.1664  | 23.0857  | 46.1076 | 13.6206 | 4.8300  | 27.4269 | 3.8779  | 5.6457 | 9.0715   | 1.0466   | 0.3151 |
| CH05-2-O | 20695.9254 | 1931.3706 | 825.0721  | 22.8039  | 46.5527 | 13.8480 | 3.6009  | 28.5276 | 4.1207  | 6.6456 | 0.4578   | 0.6916   | 0.3155 |
| CH05-3-I | 13790.0189 | 2146.9666 | 399.4183  | 92.1960  | 16.6985 | 97.3629 | 5.6534  | 11.1819 | 6.7119  | 3.2018 | 11.7328  | 0.7417   | 0.1876 |
| CH05-3-M | 16743.2356 | 1753.8397 | 904.6362  | 34.2090  | 25.3469 | 5.4664  | 5.1388  | 7.8672  | 3.6932  | 6.4927 | 192.5447 | 1.2288   | 0.2077 |
| CH05-3-O | 17257.4134 | 1673.7543 | 716.4681  | 49.1421  | 37.9256 | 9.5408  | 5.5424  | 16.9272 | 3.9697  | 5.7902 | 6.6242   | 1.6669   | 0.1509 |
| CH06-1-I | 14547.5878 | 1632.5265 | 520.0564  | 113.6886 | 28.5506 | 61.1626 | 6.0084  | 22.7617 | 4.8455  | 3.0683 | 2.2337   | 8.2047   | 0.0925 |
| CH06-1-M | 16327.2777 | 1462.7247 | 572.7169  | 83.3801  | 31.7928 | 48.6259 | 3.7107  | 13.6878 | 4.0150  | 3.1735 | 1.5008   | 7.1837   | 0.0949 |
| CH06-1-O | 15106.0700 | 1404.4630 | 780.6497  | 42.1565  | 19.9339 | 10.3427 | 2.5787  | 6.6082  | 6.5959  | 3.2261 | 2.4634   | 1.1620   | 0.0800 |
| CH06-2-I | 13485.6572 | 1728.5388 | 615.9902  | 464.9213 | 26.7309 | 71.1676 | 4.7740  | 58.9721 | 4.6705  | 3.2484 | 2.3765   | 1.9588   | 0.6561 |
| CH06-2-M | 16125.1633 | 1318.2710 | 826.9692  | 77.8859  | 30.4885 | 32.2363 | 4.7073  | 14.4454 | 7.7619  | 5.0586 | 0.9749   | 3.5417   | 0.3291 |
| CH06-2-O | 16151.7583 | 1337.9485 | 643.5998  | 36.4277  | 34.1482 | 8.0137  | 2.2905  | 7.8420  | 7.1860  | 3.3293 | 1.2837   | 2.7917   | 0.6321 |
| CH06-3-I | 12663.4124 | 1978.8489 | 709.0443  | 29.8524  | 18.6256 | 51.1686 | 16.8772 | 10.7959 | 7.0077  | 1.9904 | 27.6510  | 0.8536   | 0.2185 |
| CH06-3-M | 19499.5205 | 1663.3626 | 1212.3423 | 39.3533  | 61.8395 | 6.1914  | 6.8180  | 15.1777 | 11.2401 | 9.1340 | 6.2887   | 2.9743   | 0.0629 |
| CH06-3-O | 15906.3115 | 1544.4778 | 960.2165  | 29.6603  | 40.8124 | 4.8343  | 4.5459  | 8.2488  | 7.9020  | 3.6653 | 1.8102   | 1.0581   | 0.1407 |
| ML01-1-I | 17212.3516 | 1690.4476 | 830.6530  | 36.8956  | 24.3901 | 36.9838 | 11.1649 | 39.8863 | 4.9515  | 5.6740 | 0.9801   | 110.7289 | 0.0663 |
| ML01-1-M | 16020.9616 | 1341.6570 | 584.5288  | 140.2158 | 49.2247 | 11.9398 | 13.7764 | 48.5365 | 4.2410  | 2.9774 | 1.0506   | 9.3273   | 0.0851 |
| ML01-1-O | 20543.2220 | 1094.7464 | 646.2506  | 88.6027  | 44.6786 | 9.6609  | 3.0499  | 8.3928  | 2.2088  | 5.2045 | 16.0765  | 0.5580   | 0.0454 |
| ML01-2-I | 15017.2724 | 2106.5496 | 514.2223  | 112.3286 | 24.5664 | 31.5504 | 6.0588  | 38.9570 | 10.0958 | 4.0191 | 1.2024   | 6.0630   | 0.3582 |
| ML01-2-M | 15838.6976 | 1731.7705 | 567.8599  | 44.8884  | 44.0645 | 19.1272 | 3.6238  | 18.1589 | 6.5010  | 3.4652 | 3.0075   | 0.3985   | 0.2030 |

|                 |            |           |           |          |          |          |          |         |         |        |          |          |        |
|-----------------|------------|-----------|-----------|----------|----------|----------|----------|---------|---------|--------|----------|----------|--------|
| <b>ML01-2-O</b> | 17775.3425 | 1221.9335 | 697.9981  | 21.1719  | 50.4047  | 5.0714   | 1.7772   | 8.4253  | 3.0007  | 3.8369 | 4.0250   | 2.2469   | 0.0767 |
| <b>ML01-3-I</b> | 18152.8556 | 1785.4343 | 401.5584  | 290.0173 | 18.9791  | 22.2550  | 4.1361   | 69.9104 | 6.1776  | 3.4682 | 6.7993   | 0.8162   | 0.2906 |
| <b>ML01-3-M</b> | 15652.4337 | 2697.0440 | 559.4705  | 76.3063  | 37.0615  | 19.0971  | 3.8736   | 21.1725 | 15.0115 | 4.3961 | 74.7879  | 1.2527   | 0.2362 |
| <b>ML01-3-O</b> | 17639.7198 | 1500.4189 | 1027.4219 | 22.4572  | 48.8750  | 4.4204   | 2.4327   | 11.3302 | 3.6349  | 4.1017 | 1.6928   | 0.5328   | 0.1295 |
| <b>ML02-1-I</b> | 15514.1448 | 2494.9199 | 748.1542  | 45.7049  | 32.1001  | 86.9438  | 62.3886  | 12.8504 | 4.5106  | 4.1210 | 1.6945   | 48.7007  | 0.0884 |
| <b>ML02-1-M</b> | 17624.5881 | 1625.0742 | 811.4128  | 60.6851  | 39.1921  | 55.7787  | 33.3226  | 16.2655 | 5.2190  | 3.7258 | 4.9575   | 100.0854 | 0.1217 |
| <b>ML02-1-O</b> | 20031.6688 | 2159.5118 | 774.3599  | 21.4577  | 72.5497  | 18.9184  | 15.0324  | 10.0645 | 14.2504 | 5.1751 | 1.2431   | 2.2673   | 0.0896 |
| <b>ML02-2-I</b> | 12697.3818 | 2019.4375 | 679.9445  | 106.5371 | 19.6622  | 105.2162 | 6.0274   | 21.6654 | 18.2144 | 2.1740 | 5.0002   | 1.5327   | 0.1015 |
| <b>ML02-2-M</b> | 18053.8911 | 1195.4153 | 693.6677  | 19.6783  | 43.4258  | 16.5341  | 5.4634   | 6.2763  | 4.9846  | 4.9030 | 15.8273  | 0.5988   | 0.0667 |
| <b>ML02-2-O</b> | 24069.4450 | 1756.7382 | 980.3512  | 18.8296  | 60.8954  | 14.6794  | 3.4745   | 25.8416 | 12.2477 | 5.9966 | 0.0749   | 0.5927   | 0.0493 |
| <b>ML02-3-M</b> | 17560.1320 | 2173.9910 | 814.8369  | 94.6659  | 42.6289  | 14.3178  | 27.2260  | 34.8424 | 17.5612 | 8.0048 | 156.4900 | 3.6167   | 0.6970 |
| <b>ML02-3-O</b> | 20558.8094 | 1711.9870 | 1212.7953 | 41.9375  | 36.1432  | 9.3536   | 48.1031  | —       | 10.5930 | 6.3111 | 4.7383   | 2.9986   | 0.3205 |
| <b>TX01-1-I</b> | 16931.6201 | 2039.2625 | 605.5299  | 34.1192  | 59.9736  | 78.0543  | 29.9969  | 12.9872 | 5.0899  | 3.9651 | 8.0645   | 1.1030   | 0.0974 |
| <b>TX01-1-M</b> | 17613.7432 | 1714.2495 | 425.7080  | 78.2976  | 35.0222  | 63.2362  | 4.3908   | 12.2621 | 10.2172 | 4.9539 | 1.0175   | 1.0394   | 0.0698 |
| <b>TX01-1-O</b> | 22705.1193 | 1741.7443 | 620.8176  | 34.9535  | 70.7710  | 27.9118  | 6.2453   | 15.8623 | 23.3738 | 5.4987 | 0.7242   | 219.4189 | 0.0539 |
| <b>TX01-2-I</b> | 17197.4535 | 1901.6459 | 665.3787  | 60.6570  | 24.2351  | 113.4774 | 3.2831   | 29.4705 | 5.6209  | 3.3035 | 66.1802  | 0.7557   | 0.0683 |
| <b>TX01-2-M</b> | 16179.2287 | 1893.9682 | 651.6223  | 48.4869  | 39.4587  | 51.3942  | 3.9611   | 9.1543  | 35.5098 | 5.4185 | 104.1722 | 1.1828   | 0.0990 |
| <b>TX01-2-O</b> | 22604.8035 | 1938.6860 | 852.4433  | 24.9043  | 79.2685  | 48.8068  | 2.6891   | 40.8839 | 27.2780 | 5.4697 | 9.0970   | 1.2476   | 0.0535 |
| <b>TX01-3-I</b> | 15179.6573 | 2153.0323 | 801.0045  | 392.7557 | 38.8607  | 65.1589  | 38.1962  | 69.2699 | 11.2025 | 4.6533 | 2.1819   | 1.4343   | 0.1691 |
| <b>TX01-3-M</b> | 16394.8304 | 1893.1878 | 1231.6160 | 49.2910  | 42.9662  | 59.9222  | 20.7405  | 17.7128 | 26.7759 | 6.3077 | 1.5534   | 1.2617   | 0.0964 |
| <b>TX01-3-O</b> | 25290.5060 | 1364.0455 | 733.2661  | 96.4656  | 102.3562 | 22.1179  | 42.6587  | 51.4522 | 17.8875 | 5.1999 | 2.3025   | 1.0107   | 0.1845 |
| <b>TX02-1-I</b> | 18266.7278 | 1840.4732 | 443.8042  | 35.4648  | 55.3555  | 89.4680  | 61.1445  | 24.9656 | 14.1473 | 2.4177 | 0.9335   | 1.5988   | 0.1638 |
| <b>TX02-1-M</b> | 23521.3375 | 1839.2017 | 580.9640  | 50.5365  | 82.1256  | 32.0747  | —        | 54.2393 | 14.3653 | 4.0639 | 1.0909   | 106.5168 | 0.2921 |
| <b>TX02-1-O</b> | 22378.4192 | 1750.1796 | 593.7908  | 30.7762  | 65.8634  | 23.2170  | 31.7774  | 14.4978 | 13.3768 | 4.6748 | 0.6937   | 24.2311  | 0.0734 |
| <b>TX02-2-I</b> | 13639.8045 | 1932.3611 | 477.4406  | 27.5069  | 36.5239  | 72.2526  | 5.3611   | 19.6908 | 23.0684 | 1.9949 | 1.9511   | 1.0604   | 0.1215 |
| <b>TX02-2-M</b> | 18086.6193 | 1113.0580 | 462.0725  | 21.7869  | 35.6739  | 26.9760  | 3.0903   | 10.0693 | 9.6821  | 3.1120 | 1.8259   | 0.6568   | 0.1591 |
| <b>TX02-2-O</b> | 20241.0479 | 1521.7099 | 871.3143  | 31.6807  | 52.4426  | 19.5752  | 7.7991   | 13.5881 | 13.6517 | 4.3877 | 0.4893   | 0.8093   | 0.0888 |
| <b>TX02-3-I</b> | 17692.9628 | 1891.9985 | 497.1118  | 57.7231  | 53.4823  | 41.7154  | 93.3489  | 65.1084 | 21.2207 | 2.8761 | 1.3692   | 5.5420   | 0.3514 |
| <b>TX02-3-M</b> | 16553.7790 | 1216.4613 | 1004.6116 | 28.4702  | 67.9549  | 6.0728   | 19.9046  | 11.0534 | 2.9641  | 5.8637 | 0.9889   | 1.5587   | 0.1135 |
| <b>TX02-3-O</b> | 23030.4013 | 1544.9770 | 753.9727  | 19.6472  | 85.7653  | 18.9597  | 16.6053  | 27.1450 | 12.2077 | 4.5092 | 0.5858   | 1.0069   | 0.0669 |
| <b>TX03-1-I</b> | 16387.2965 | 1550.0072 | 433.6207  | 30.3831  | 43.0523  | 49.4843  | 11.9399  | 7.9963  | 13.9102 | 2.7936 | n.d.     | n.d.     | 0.0673 |
| <b>TX03-1-M</b> | —          | 1339.3186 | 838.1111  | 41.9880  | 53.5240  | 20.5448  | 599.8299 | —       | 12.7097 | 4.4159 | 0.6868   | 0.8568   | —      |
| <b>TX03-1-O</b> | 23462.0583 | 1304.4545 | 441.9859  | 17.9649  | 53.2962  | 6.1070   | 11.2143  | 6.4693  | 12.6254 | 3.4816 | 0.3439   | 36.6723  | 0.0415 |

|                 |            |           |           |          |         |          |          |         |         |        |         |          |        |
|-----------------|------------|-----------|-----------|----------|---------|----------|----------|---------|---------|--------|---------|----------|--------|
| <b>TX03-2-I</b> | 13986.9212 | 1796.0977 | 903.2772  | 444.6014 | 26.5547 | 51.6182  | 8.0105   | 45.9847 | 16.1564 | 2.2666 | 17.1737 | 4.3638   | 0.1050 |
| <b>TX03-2-M</b> | 17125.3256 | 1317.1476 | 546.9663  | 26.7269  | 27.5041 | 35.6766  | 3.2475   | 7.3832  | 11.0249 | 3.4695 | 93.1398 | 1.3436   | 0.0803 |
| <b>TX03-2-O</b> | 20707.6016 | 1333.4038 | 810.4100  | 13.4296  | 45.8253 | 8.7505   | 3.4607   | 11.0349 | 12.3857 | 3.1625 | 2.7872  | 0.4742   | 0.0429 |
| <b>TX03-3-I</b> | 14912.5167 | 1756.7982 | 599.2378  | 689.2893 | 36.3032 | 133.2496 | 16.0461  | 57.4879 | 12.8779 | 3.3207 | 6.9151  | 2.7597   | 0.2138 |
| <b>TX03-3-M</b> | 17558.5573 | 1492.1324 | 582.2880  | 45.9551  | 40.0857 | 22.6274  | 27.7218  | 14.4589 | 12.2625 | 4.6743 | 2.6577  | 2.1514   | 0.1544 |
| <b>TX03-3-O</b> | 24902.2897 | 1240.4945 | 967.6316  | 300.6710 | 59.8389 | 12.1346  | 21.7361  | 21.0405 | 12.1607 | 3.6047 | 5.9870  | 1.7242   | 0.1099 |
| <b>TX04-1-I</b> | 16925.0697 | 1495.2126 | 571.6795  | 106.1501 | 42.3888 | 60.3001  | 18.6099  | 13.0150 | 6.2721  | 3.4423 | 0.8646  | 90.6860  | 0.0755 |
| <b>TX04-1-M</b> | 16633.3500 | 1399.4657 | 509.6528  | 37.9847  | 51.8203 | 19.5525  | 26.3189  | 12.7444 | 6.4851  | 3.6301 | 1.1698  | 5.4467   | 0.0683 |
| <b>TX04-1-O</b> | 19164.4639 | 1588.5067 | 417.1402  | 48.6861  | 25.1933 | 10.4760  | 15.7024  | 13.6953 | 14.6218 | 4.5580 | 0.8426  | 97.9225  | 0.0626 |
| <b>TX04-2-I</b> | 13762.7018 | 2115.7223 | 571.8445  | 107.7103 | 23.0391 | 78.6904  | 4.3537   | 15.2137 | 9.1889  | 2.2394 | 5.8042  | 1.0050   | 0.0825 |
| <b>TX04-2-M</b> | 14404.1268 | 2399.0912 | 637.6065  | 29.1487  | 47.8800 | 467.3078 | 4.5092   | 8.8081  | 19.1856 | 4.3110 | 68.3496 | 0.7699   | 0.0696 |
| <b>TX04-2-O</b> | 17009.8468 | 1582.0838 | 682.1808  | 33.5340  | 18.9670 | 13.2820  | 6.4018   | 21.3305 | 14.5738 | 4.7162 | 5.0883  | 0.9332   | 0.0580 |
| <b>TX04-3-I</b> | 14491.6120 | 2802.9268 | 632.5405  | 131.7661 | 39.7196 | 177.2918 | 11.9481  | 25.9503 | 19.9158 | 2.0668 | 1.9432  | 0.8727   | 0.1288 |
| <b>TX04-3-M</b> | 18413.4197 | 2342.9133 | 782.8829  | 39.1368  | 77.1061 | 48.9115  | 8.8840   | 10.8761 | 22.7688 | 6.0561 | 2.5239  | 0.7523   | 0.0926 |
| <b>TX04-3-O</b> | 18401.9352 | 1435.9790 | 678.7292  | 35.1875  | 28.6528 | 10.3203  | 16.6486  | 40.5255 | 13.3143 | 4.6788 | 2.4142  | 2.5078   | 0.0744 |
| <b>TX05-1-I</b> | 11965.8789 | 2439.1030 | 478.7174  | 212.5180 | 35.3392 | 67.3803  | 3.0524   | 44.8288 | 6.9508  | 1.9228 | 32.9120 | 128.5271 | 0.1755 |
| <b>TX05-1-M</b> | 19304.2977 | 1867.3469 | 741.2838  | 69.9399  | 41.4013 | 17.5402  | 9.0991   | 10.5068 | 7.6226  | 5.8618 | n.d.    | n.d.     | 0.1281 |
| <b>TX05-1-O</b> | 18401.6271 | 1889.4447 | 481.5135  | 37.4920  | 46.3221 | 38.3039  | 3.7190   | 5.1040  | 8.0670  | 5.4372 | 3.7903  | 2.3682   | 0.0843 |
| <b>TX05-2-I</b> | 11258.1252 | 2413.3645 | 810.8120  | 79.6546  | 34.7362 | 64.5789  | 6.9676   | 18.6335 | 7.5005  | 2.3537 | 2.5232  | 1.2486   | 0.6423 |
| <b>TX05-2-M</b> | 17631.5401 | 2121.3534 | 1150.3249 | 78.3524  | 43.3882 | 107.6397 | 10.7178  | 16.8024 | 8.4214  | 6.3687 | 11.4739 | 2.5471   | 0.1198 |
| <b>TX05-2-O</b> | 23005.6006 | 1633.8450 | 785.8004  | 26.0031  | 58.3584 | 34.2214  | 6.3368   | 8.8434  | 5.1285  | 5.1888 | 1.0468  | 0.7715   | 0.1010 |
| <b>TX05-3-I</b> | 15913.3792 | 2286.4961 | 651.3513  | 57.4960  | 47.8436 | 85.9983  | 34.5834  | 33.6494 | 8.4633  | 3.9530 | 5.8613  | 4.1426   | 0.2072 |
| <b>TX05-3-M</b> | 20065.1159 | 1838.8627 | 567.3435  | 47.9018  | 38.3446 | 126.0821 | 45.7655  | 24.4558 | 6.3879  | 5.6694 | 1.1330  | 2.3851   | 0.1525 |
| <b>TX05-3-O</b> | 28214.5332 | 1763.4236 | 818.7590  | 15.7670  | 76.2012 | 45.2978  | 38.9577  | 17.9686 | 5.6157  | 6.7243 | 0.8581  | 0.9979   | 0.0809 |
| <b>TX06-1-I</b> | 18867.1337 | 2435.7898 | 365.2645  | 9.6975   | 54.9231 | 136.7840 | 3.8898   | 19.0468 | 26.3167 | 1.2652 | n.d.    | n.d.     | 0.0955 |
| <b>TX06-1-M</b> | 19285.1898 | 2912.9463 | 766.3452  | n.d.     | 74.3399 | 2.3625   | 0.6931   | n.d.    | 37.6507 | 5.5963 | n.d.    | n.d.     | n.d.   |
| <b>TX06-1-O</b> | 20238.4805 | 1422.1761 | 716.4981  | 1.3186   | 68.2564 | 4.7678   | 7.1160   | 6.8821  | 11.3255 | 2.8892 | n.d.    | n.d.     | 0.0023 |
| <b>TX06-2-I</b> | 15060.4380 | 2692.8093 | 436.0571  | 35.8905  | 44.7726 | 171.0978 | 2.9755   | 34.9189 | 28.0953 | 2.3345 | n.d.    | n.d.     | 0.2079 |
| <b>TX06-2-M</b> | 17015.8222 | 2250.2884 | 911.1091  | 49.0101  | 92.9677 | 44.2760  | 10.4255  | 16.5739 | 42.5514 | 9.7789 | n.d.    | n.d.     | 0.2434 |
| <b>TX06-2-O</b> | 18678.5375 | 1434.4219 | 639.6078  | 30.2132  | 65.3935 | 6.5457   | 5.9535   | 19.6582 | 12.2123 | 3.8169 | n.d.    | n.d.     | 0.0333 |
| <b>TX06-3-I</b> | 14265.6285 | 2009.2347 | 334.9822  | 39.7130  | 43.3261 | 86.5904  | 27.1533  | 20.3551 | 27.2980 | 3.9860 | 1.5590  | 3.0410   | 0.1788 |
| <b>TX06-3-M</b> | 20617.0894 | 1727.6640 | 554.8291  | 117.8029 | 93.4877 | 62.4261  | 263.6815 | —       | n.d.    | 8.4721 | n.d.    | n.d.     | 0.7200 |
| <b>TX06-3-O</b> | 19974.3171 | 1301.8546 | 806.6921  | 70.2476  | 73.7729 | 9.5685   | 59.0258  | 16.8413 | 10.2423 | 3.8558 | 1.0897  | 1.2210   | 0.1030 |

|               |            |           |           |          |          |          |         |         |        |        |          |        |        |
|---------------|------------|-----------|-----------|----------|----------|----------|---------|---------|--------|--------|----------|--------|--------|
| <b>CY-1-I</b> | 13050.9784 | 2419.5348 | 663.3433  | 40.0272  | 29.7095  | 153.3404 | 2.5755  | 18.1604 | 8.1608 | 2.1356 | 1.3077   | 0.5688 | 0.1328 |
| <b>CY-1-M</b> | 15347.8606 | 1410.5742 | 718.9749  | 35.9207  | 33.2406  | 9.3110   | 21.5355 | 17.9107 | 4.5855 | 4.3880 | 3.7918   | 0.3149 | 0.1304 |
| <b>CY-1-O</b> | 20139.1866 | 1487.1859 | 739.0703  | 18.2410  | 63.6387  | 14.5047  | 1.3881  | 4.1605  | 7.6030 | 3.9356 | 0.3885   | 0.3617 | 0.0529 |
| <b>CY-2-I</b> | 13934.0340 | 2299.5667 | 689.8583  | 122.6436 | 28.0694  | 155.1980 | 2.9809  | 48.1936 | 9.5908 | 2.9547 | 33.0823  | 2.4204 | 0.1495 |
| <b>CY-2-M</b> | 14590.2721 | 1739.6985 | 845.5140  | 20.4201  | 39.5763  | 6.8094   | 1.4606  | 6.4987  | 8.7168 | 4.2774 | 194.9139 | 0.7590 | 0.1917 |
| <b>CY-2-O</b> | 20149.2053 | 1626.9578 | 703.2159  | 31.1104  | 65.9087  | 14.9538  | 8.9619  | 4.6321  | 8.0214 | 4.2491 | 0.8076   | 0.2062 | 0.0105 |
| <b>CY-3-I</b> | 17315.2635 | 2173.0412 | 760.6626  | 76.6897  | 46.0558  | 174.6529 | 46.2341 | 41.2629 | 5.5250 | 3.5236 | 4.2878   | 0.8095 | 0.2496 |
| <b>CY-3-M</b> | 13899.6817 | 2240.4651 | 1188.0526 | 34.8593  | 42.2366  | 10.7111  | 12.2097 | 10.2766 | 9.3261 | 8.8902 | 1.0032   | 0.8236 | 0.0973 |
| <b>CY-3-O</b> | 22851.4011 | 1956.3688 | 881.3506  | 16.2622  | 79.5834  | 15.7606  | 29.9331 | 11.0249 | 9.0167 | 5.2011 | 0.9868   | 0.7082 | 0.0683 |
| <b>BM-1-I</b> | 16556.3101 | 1686.5093 | 584.3621  | 326.3346 | 32.1013  | 99.3206  | 3.7723  | 51.9028 | 6.5908 | 3.2101 | 2.8639   | 1.4577 | 0.1021 |
| <b>BM-1-M</b> | 15551.9445 | 1647.3760 | 553.7957  | 32.9821  | 48.3059  | 9.3278   | 3.0551  | 7.7710  | 2.7969 | 3.4679 | 136.1777 | 1.4647 | 0.2244 |
| <b>BM-1-O</b> | 19671.9570 | 1673.0344 | 529.0950  | 63.9007  | 71.0568  | 15.0870  | 1.3218  | 8.0888  | 3.7376 | 4.0799 | 20.2918  | 0.6377 | 0.2110 |
| <b>BM-2-I</b> | 17381.9751 | 1846.4001 | 320.0035  | 33.1727  | 37.1153  | 42.2393  | 5.6735  | 36.4801 | 3.7602 | 2.9728 | 137.5336 | 1.1455 | 0.1019 |
| <b>BM-2-M</b> | 16580.5445 | 1430.9717 | 415.8999  | 33.0572  | 36.8967  | 13.6948  | 1.7370  | 6.7452  | 2.2903 | 4.5201 | 9.6716   | 0.7678 | 0.0979 |
| <b>BM-2-O</b> | 20541.7697 | 1455.9665 | 868.8644  | 15.2449  | 82.3446  | 6.6833   | 1.0572  | 5.0318  | 2.8690 | 4.5429 | 3.7420   | 0.5291 | 0.0586 |
| <b>BM-3-I</b> | 17831.9105 | 1455.8224 | 519.4547  | 165.1220 | 42.8334  | 70.7899  | 66.9773 | 29.6668 | 5.5830 | 3.9368 | 7.8139   | 2.6191 | 0.3509 |
| <b>BM-3-M</b> | 17036.5575 | 1294.6909 | 974.6048  | 119.2471 | 58.1294  | 20.4730  | 71.4825 | 31.4896 | 2.4597 | 7.5256 | 2.1914   | 1.1661 | 0.2018 |
| <b>BM-3-O</b> | 24010.2543 | 1814.5487 | 1016.5312 | 35.7519  | 56.2413  | 37.6909  | 13.9343 | 33.4071 | 4.9072 | 7.7803 | 0.3579   | 0.8451 | 0.0925 |
| <b>QG-1-I</b> | 18076.9236 | 2038.8159 | 516.9266  | 182.5987 | 81.1295  | 75.9462  | 19.3140 | 20.7886 | 5.7865 | 3.8961 | 7.4851   | 0.7979 | 0.0735 |
| <b>QG-1-M</b> | 16267.1583 | 2294.4945 | 550.1412  | 60.2629  | 78.6000  | 21.4714  | 1.8129  | 10.4743 | 7.3544 | 3.9251 | 1.3830   | 1.1011 | 0.0923 |
| <b>QG-1-O</b> | 23359.7348 | 1504.6976 | 472.6977  | 3.3223   | 89.8275  | 8.2764   | 0.7323  | 2.7926  | 3.0341 | 4.4333 | 0.4236   | 0.1289 | 0.0350 |
| <b>QG-2-I</b> | 16318.6178 | 2324.7429 | 690.7415  | 309.0564 | 82.8055  | 62.0758  | 2.7078  | 35.4367 | 6.9389 | 4.6280 | 20.2574  | 0.9742 | 0.1414 |
| <b>QG-2-M</b> | 16806.0841 | 1884.6655 | 635.1613  | 70.9018  | 68.5531  | 8.6421   | 9.7530  | 13.3095 | 5.3557 | 4.7585 | 3.9112   | 0.4675 | 0.1422 |
| <b>QG-2-O</b> | 21661.2991 | 1385.5045 | 536.5483  | 10.6804  | 82.5813  | 5.5288   | 2.1457  | 6.8786  | 2.9377 | 4.7750 | 2.0045   | 0.3174 | 0.0485 |
| <b>QG-3-I</b> | 16121.0731 | 2368.9981 | 679.5959  | 63.3453  | 90.4745  | 60.0458  | 54.3858 | 39.9945 | 6.1590 | 3.2772 | 2.7057   | 3.6246 | 0.2883 |
| <b>QG-3-M</b> | 16253.5809 | 1177.1718 | 825.5921  | 94.7390  | 77.5543  | 14.9733  | 90.7718 | 23.2150 | 8.4636 | 5.1772 | n.d.     | n.d.   | 0.2188 |
| <b>QG-3-O</b> | 23585.9895 | 2188.4566 | 587.6322  | 27.4924  | 104.5881 | 9.3686   | 23.9148 | 16.8987 | 6.0740 | 7.1423 | 2.3403   | 1.2696 | 0.1250 |

I : inner site ; M : middle site ; O : outer site.

**Table S2.** The mean  $\pm$  standard deviation (SD) of 13 trace element concentrations (ppm) in the inner site of the shell at each site.

| Sampling site | Na               | Sr             | Mg            | Fe              | B              | Mn              | Zn            | P               | Ba            | Li            | Ni            | Cu            | Pb              |
|---------------|------------------|----------------|---------------|-----------------|----------------|-----------------|---------------|-----------------|---------------|---------------|---------------|---------------|-----------------|
| <b>DS-w</b>   | 16309 $\pm$ 1509 | 1964 $\pm$ 234 | 520 $\pm$ 113 | 33.4 $\pm$ 41.6 | 40.7 $\pm$ 5.9 | 37.1 $\pm$ 24.3 | 5.7 $\pm$ 7.7 | 23.4 $\pm$ 22.9 | 2.2 $\pm$ 0.4 | 7.3 $\pm$ 7.2 | 1.9 $\pm$ 1.5 | 2.9 $\pm$ 4.2 | 0.16 $\pm$ 0.03 |

|             |              |            |           |               |             |              |             |             |            |           |             |             |             |
|-------------|--------------|------------|-----------|---------------|-------------|--------------|-------------|-------------|------------|-----------|-------------|-------------|-------------|
| <b>SS-w</b> | 18899 ± 1380 | 1979 ± 303 | 501 ± 72  | 115.1 ± 43.6  | 71.9 ± 19.8 | 48.8 ± 6.1   | 20.9 ± 33.4 | 31.5 ± 12.7 | 5.2 ± 0.8  | 3.2 ± 0.3 | 2.1 ± 0.8   | 0.7 ± 0.6   | 0.11 ± 0.05 |
| <b>XX-w</b> | 16967 ± 739  | 1648 ± 232 | 647 ± 169 | 37.3 ± 56.5   | 40 ± 10.9   | 22.2 ± 14.4  | 9.6 ± 14.4  | 13.2 ± 14.7 | 1.5 ± 0.2  | 5.7 ± 0.6 | 2.6 ± 3.2   | 2.4 ± 3.5   | 0.27 ± 0.35 |
| <b>ZS-w</b> | 17846 ± 1580 | 1717 ± 239 | 510 ± 103 | 32.1 ± 22.5   | 35 ± 18.6   | 18.3 ± 8.5   | 9.3 ± 13.1  | 13.4 ± 8.6  | 2 ± 0.5    | 5.5 ± 1.5 | 4.2 ± 2.1   | 1.1 ± 0.9   | 0.22 ± 0.13 |
| <b>CH</b>   | 14616 ± 1301 | 2025 ± 353 | 569 ± 153 | 88.6 ± 100.4  | 29 ± 10.1   | 80.8 ± 36.2  | 14.2 ± 12.1 | 25.6 ± 15.7 | 8.8 ± 5.1  | 3 ± 0.6   | 6.8 ± 7.5   | 2.4 ± 3     | 0.31 ± 0.28 |
| <b>ML</b>   | 15719 ± 2111 | 2019 ± 315 | 635 ± 175 | 118.3 ± 101.9 | 23.9 ± 5.2  | 56.6 ± 37    | 18 ± 25     | 36.7 ± 21.9 | 8.8 ± 5.7  | 3.9 ± 1.3 | 3.1 ± 2.6   | 33.6 ± 47.5 | 0.18 ± 0.13 |
| <b>TX</b>   | 15372 ± 2084 | 2086 ± 366 | 571 ± 156 | 141.8 ± 183.8 | 41.1 ± 10.6 | 90.2 ± 40.2  | 21.2 ± 24   | 31 ± 18.5   | 14.6 ± 7.9 | 2.8 ± 0.9 | 8.7 ± 16.5  | 13.8 ± 35.5 | 0.18 ± 0.14 |
| <b>CY</b>   | 14767 ± 2251 | 2297 ± 123 | 705 ± 50  | 79.8 ± 41.4   | 34.6 ± 9.9  | 161.1 ± 11.8 | 17.3 ± 25.1 | 35.9 ± 15.7 | 7.8 ± 2.1  | 2.9 ± 0.7 | 12.9 ± 17.5 | 1.3 ± 1     | 0.18 ± 0.06 |
| <b>BM</b>   | 17257 ± 647  | 1663 ± 196 | 475 ± 138 | 174.9 ± 146.8 | 37.4 ± 5.4  | 70.8 ± 28.5  | 25.5 ± 36   | 39.3 ± 11.4 | 5.3 ± 1.4  | 3.4 ± 0.5 | 49.4 ± 76.4 | 1.7 ± 0.8   | 0.19 ± 0.14 |
| <b>QG</b>   | 16839 ± 1077 | 2244 ± 179 | 629 ± 97  | 185 ± 122.9   | 84.8 ± 5    | 66 ± 8.7     | 25.5 ± 26.4 | 32.1 ± 10   | 6.3 ± 0.6  | 3.9 ± 0.7 | 10.1 ± 9.1  | 1.8 ± 1.6   | 0.17 ± 0.11 |

**Table S3.** The mean ± standard deviation (SD) of 13 trace element concentrations (ppm) in the middle site of the shell at each site.

| Sampling site | Na           | Sr         | Mg        | Fe            | B           | Mn           | Zn          | P           | Ba          | Li        | Ni            | Cu            | Pb          |
|---------------|--------------|------------|-----------|---------------|-------------|--------------|-------------|-------------|-------------|-----------|---------------|---------------|-------------|
| <b>DS-w</b>   | 17259 ± 275  | 1555 ± 164 | 698 ± 125 | 107.5 ± 157.9 | 55.6 ± 4.1  | 8.98 ± 3.7   | 9.2 ± 6.1   | 9.4 ± 2.4   | 1.4 ± 0.15  | 5.6 ± 1.3 | 138.8 ± 236.8 | 1.33 ± 1.43   | 0.28 ± 0.24 |
| <b>SS-w</b>   | 17031 ± 883  | 2498 ± 367 | 581 ± 116 | 95.8 ± 97.4   | 118.5 ± 6.8 | 27.2 ± 13.5  | 9 ± 10.5    | 17.6 ± 11.8 | 4.9 ± 0.7   | 4.1 ± 0.8 | 205.6 ± 181.3 | 1.41 ± 0.59   | 0.33 ± 0.14 |
| <b>XX-w</b>   | 16423 ± 321  | 1415 ± 221 | 842 ± 199 | 35.9 ± 37.4   | 55.9 ± 9    | 12.4 ± 7.5   | 7.1 ± 10.5  | 8.7 ± 6.9   | 1.27 ± 0.39 | 5.1 ± 0.4 | 3.1 ± 3.3     | 1.94 ± 2.37   | 0.19 ± 0.12 |
| <b>ZS-w</b>   | 17947 ± 544  | 1455 ± 116 | 1013 ± 81 | 17.9 ± 5.2    | 52.7 ± 5    | 4.7 ± 1.5    | 4.5 ± 4.5   | 8.6 ± 6.4   | 1.64 ± 0.27 | 9 ± 2.6   | 2.1 ± 1.5     | 0.63 ± 0.25   | 0.13 ± 0.02 |
| <b>CH</b>     | 16412 ± 1228 | 1873 ± 425 | 797 ± 234 | 44.7 ± 28.2   | 36 ± 10.9   | 34 ± 36      | 8.3 ± 6.9   | 13.1 ± 7.2  | 8.5 ± 4.8   | 5.3 ± 1.6 | 21.3 ± 48.6   | 4.09 ± 5.88   | 0.16 ± 0.1  |
| <b>ML</b>     | 16792 ± 1066 | 1794 ± 558 | 672 ± 120 | 72.7 ± 41.9   | 42.6 ± 4.2  | 22.8 ± 16.4  | 14.5 ± 12.9 | 24.2 ± 15.1 | 8.9 ± 5.8   | 4.6 ± 1.8 | 42.7 ± 62.3   | 19.21 ± 39.76 | 0.24 ± 0.24 |
| <b>TX</b>     | 17680 ± 1592 | 1815 ± 469 | 719 ± 232 | 47.8 ± 26.1   | 54.7 ± 21   | 67.5 ± 104.9 | 13.3 ± 12.5 | 12.2 ± 15.5 | 15.9 ± 12.3 | 5.4 ± 1.7 | 16.2 ± 34     | 7.1 ± 24.8    | 0.16 ± 0.16 |
| <b>CY</b>     | 14613 ± 724  | 1797 ± 418 | 918 ± 243 | 30.4 ± 8.7    | 38.4 ± 4.6  | 8.9 ± 2      | 11.7 ± 10   | 11.6 ± 5.8  | 7.5 ± 2.6   | 5.9 ± 2.6 | 66.6 ± 111.2  | 0.63 ± 0.28   | 0.14 ± 0.05 |

|           |             |            |           |             |             |            |             |            |             |             |             |             |             |
|-----------|-------------|------------|-----------|-------------|-------------|------------|-------------|------------|-------------|-------------|-------------|-------------|-------------|
| <b>BM</b> | 16390 ± 760 | 1458 ± 178 | 648 ± 291 | 61.8 ± 49.8 | 47.8 ± 10.6 | 14.5 ± 5.6 | 25.4 ± 39.9 | 15.3 ± 14  | 2.52 ± 0.26 | 5.17 ± 2.11 | 49.3 ± 75.3 | 1.13 ± 0.35 | 0.17 ± 0.07 |
| <b>QG</b> | 16442 ± 315 | 1785 ± 565 | 670 ± 141 | 75.3 ± 17.7 | 74.9 ± 5.5  | 15 ± 6.4   | 34.1 ± 49.2 | 15.7 ± 6.7 | 7.06 ± 1.58 | 4.62 ± 0.64 | 1.8 ± 2     | 0.52 ± 0.55 | 0.15 ± 0.06 |

**Table S4.** The mean ± standard deviation (SD) of 13 trace element concentrations (ppm) in the outer site of the shell at each site.

| Sampling site | Na           | Sr         | Mg        | Fe          | B           | Mn          | Zn          | P           | Ba          | Li         | Ni         | Cu            | Pb          |
|---------------|--------------|------------|-----------|-------------|-------------|-------------|-------------|-------------|-------------|------------|------------|---------------|-------------|
| <b>DS-w</b>   | 18436 ± 1582 | 1213 ± 57  | 596 ± 153 | 11.4 ± 9.9  | 64.4 ± 8.3  | 1.6 ± 1.3   | 9.1 ± 10.9  | 12.4 ± 14.1 | 0.8 ± 0.05  | 3.2 ± 0.8  | 5.8 ± 8    | 0.54 ± 0.57   | 0.12 ± 0.06 |
| <b>SS-w</b>   | 23958 ± 2372 | 2027 ± 185 | 389 ± 42  | 23.9 ± 25.3 | 192.2 ± 8   | 44.9 ± 31.3 | 8.6 ± 3.5   | 14.3 ± 2.6  | 4.2 ± 0.7   | 5.2 ± 0.3  | 0.7 ± 0.3  | 0.47 ± 0.18   | 0.06 ± 0.02 |
| <b>XX-w</b>   | 21692 ± 854  | 1200 ± 75  | 648 ± 48  | 25.8 ± 29.5 | 62.9 ± 9.9  | 4.5 ± 1.3   | 29.9 ± 49.2 | 8.1 ± 7.3   | 0.8 ± 0.11  | 11.2 ± 2.2 | 3.7 ± 4.7  | 1.2 ± 0.14    | 0.1 ± 0.08  |
| <b>ZS-w</b>   | 22416 ± 2139 | 1220 ± 104 | 654 ± 73  | 14.9 ± 7.2  | 82.4 ± 16.3 | 2.3 ± 0.8   | 6 ± 7.4     | 9.4 ± 4.9   | 1.4 ± 0.5   | 8.9 ± 4.6  | 1.6 ± 1.2  | 0.47 ± 0.28   | 0.08 ± 0.01 |
| <b>CH</b>     | 19220 ± 3082 | 1848 ± 308 | 854 ± 214 | 40.6 ± 20.2 | 39.1 ± 9.9  | 12.3 ± 6.1  | 9 ± 8.3     | 18.9 ± 16.4 | 6.3 ± 2.31  | 6.2 ± 1.9  | 3.3 ± 6.8  | 1.75 ± 1.02   | 0.23 ± 0.16 |
| <b>ML</b>     | 20103 ± 2351 | 1574 ± 388 | 890 ± 219 | 35.7 ± 27.2 | 52.3 ± 12.8 | 10.4 ± 5.6  | 12.3 ± 18.2 | 12.8 ± 7.4  | 7.7 ± 5.3   | 5.1 ± 1    | 4.6 ± 5.9  | 1.53 ± 1.1    | 0.12 ± 0.1  |
| <b>TX</b>     | 21578 ± 2887 | 1544 ± 209 | 704 ± 151 | 48.3 ± 66.6 | 59.8 ± 21.6 | 20 ± 13.8   | 16.9 ± 16.1 | 19.6 ± 12.9 | 13.3 ± 5.38 | 4.5 ± 1    | 2.1 ± 2.5  | 21.85 ± 54.82 | 0.07 ± 0.04 |
| <b>CY</b>     | 21047 ± 1563 | 1690 ± 241 | 775 ± 94  | 21.9 ± 8.1  | 69.7 ± 8.6  | 15 ± 0.6    | 13.4 ± 14.8 | 6.6 ± 3.8   | 8.2 ± 0.73  | 4.5 ± 0.7  | 0.7 ± 0.3  | 0.43 ± 0.26   | 0.04 ± 0.03 |
| <b>BM</b>     | 21408 ± 2295 | 1648 ± 181 | 805 ± 250 | 38.3 ± 24.4 | 69.9 ± 13.1 | 19.8 ± 16   | 5.4 ± 7.4   | 15.5 ± 15.6 | 3.8 ± 1.02  | 5.5 ± 2    | 8.1 ± 10.7 | 0.67 ± 0.16   | 0.12 ± 0.08 |
| <b>QG</b>     | 22869 ± 1052 | 1693 ± 433 | 532 ± 58  | 13.8 ± 12.4 | 92.3 ± 11.2 | 7.7 ± 2     | 8.9 ± 13    | 8.9 ± 7.3   | 4 ± 1.78    | 5.5 ± 1.5  | 1.6 ± 1    | 0.57 ± 0.61   | 0.07 ± 0.05 |
